# Supplementary material for: Environmental, cost, and chemical hazards of using alternative green solvents for fullerene (C60) purification
Source: Royal Society of Chemistry journal article supplement (doi:10.1039/d3gc00859b), 2023-01-01
Supplement: d3gc00859b1.pdf [file d3gc00859b1.pdf]

## **Environmental, Cost, and Chemical Hazards of Using Alternative Green Solvents for Fullerene (C<sub>60</sub>) Purification**

Seyed M. Heidari<sup>a</sup>, Eunsang lee<sup>a</sup>, Ben Cecil<sup>a</sup>, Annick Anctil <sup>\*a</sup>

<sup>a</sup> Department of Civil and Environmental Engineering, Michigan State University, East Lansing, Michigan 48824, United States.

\* Corresponding author: ([anctilan@msu.edu](mailto:anctilan@msu.edu))

Emails: [Heidari1@msu.edu](mailto:Heidari1@msu.edu), [leeeunsa@msu.edu](mailto:leeeunsa@msu.edu), [cecilben@msu.edu](mailto:cecilben@msu.edu), [anctilan@msu.edu](mailto:anctilan@msu.edu)

**Keywords:** C<sub>60</sub> fullerene purification, nanomaterial manufacturing, Life cycle assessment, Green chemistry, Toxicity, Solvent

**Content:** 10 figures and five tables (7 pages)

## S1 – C<sub>60</sub> production process

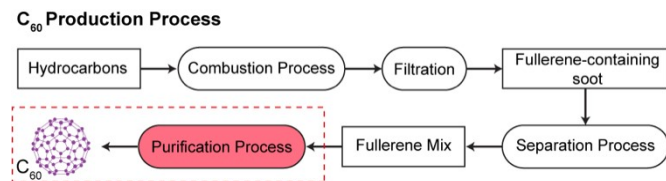

**Fig. S1.** C<sub>60</sub> synthesis procedure – Rectangulars show materials. Red dashed lines demonstrate the study scope of this study, and C<sub>60</sub> purification is distinguished in the red box.

## S2 – Green chemistry principles

**Table S1.** Green chemistry principles (1)

| Principle # | Description                                                                           | How we used                                                                                                                                  |
|-------------|---------------------------------------------------------------------------------------|----------------------------------------------------------------------------------------------------------------------------------------------|
| 1           | Waste prevention instead of cleaning waste after it is formed                         | N/A                                                                                                                                          |
| 2           | Maximize the incorporation of all used materials into the final products              | N/A                                                                                                                                          |
| 3           | Using substances that have little or no toxicity for human health and the environment | We categorized potential solvents based on toxicity scores and identified alternative solvents with lower toxicity.                          |
| 4           | Design safer chemicals with lower environmental toxicity                              | We identified non-hazardous alternative solvents to avoid toxifying the final products.                                                      |
| 5           | Use less solvents                                                                     | We categorized potential solvents based on their fullerene solubility to reduce the amount of solvents necessary for fullerene purification. |
| 6           | Minimizing energy                                                                     | N/A                                                                                                                                          |
| 7           | Using renewable feedstock                                                             | We identified plant-based alternative solvents besides petroleum-based solvents.                                                             |
| 8           | Avoiding unnecessary derivatization                                                   | N/A                                                                                                                                          |
| 9           | Catalytic reagents are better than stoichiometric reagents                            | N/A                                                                                                                                          |
| 10          | Avoid using undegradable chemicals                                                    | N/A                                                                                                                                          |
| 11          | In-process monitoring to avoid generating hazardous materials                         | We used analytical chemistry (HPLC-UV) to monitor the impurity.                                                                              |
| 12          | Safer substrates for accident prevention                                              | We determined alternative non-hazardous solvents to reduce accidental release risk.                                                          |

### S3 - Data source for life-cycle assessment

**Table S2.** Data sources for material and energy used in inventory analysis

|                                     | Description                                                                                                              | Ref.   |
|-------------------------------------|--------------------------------------------------------------------------------------------------------------------------|--------|
| 1,2,4-trimethylbenzene              | Co-production of mesitylene, xylenes, and benzene from naphtha cracking                                                  | (2)    |
| 1,8-Diazabicyclo (5.4.0)undec-7-ene | Synthesis of bicyclic amidines from caprolactam by using acrylonitrile                                                   | (3)    |
| Linseed oil                         | Process modification from Refined sunflower oil (pressing), at processing, Agri-footprint 5.0; Linseed seed, Ecoinvent 3 | (4)    |
| Olive oil                           | Process modification from olive production, Ecoinvent 3 (4), based on information on olive oil production(5)             | (4)(5) |
| Centrifuge                          | Required energy was estimated based on using industrial-scale equipment.                                                 | (6)    |
| Mixer                               |                                                                                                                          | (7)    |
| Pump                                |                                                                                                                          | (8)    |
| Ultrasonic bath                     |                                                                                                                          | (9)    |
| Ultrasonic probe                    |                                                                                                                          | (10)   |

### S4 - Detailed methodology

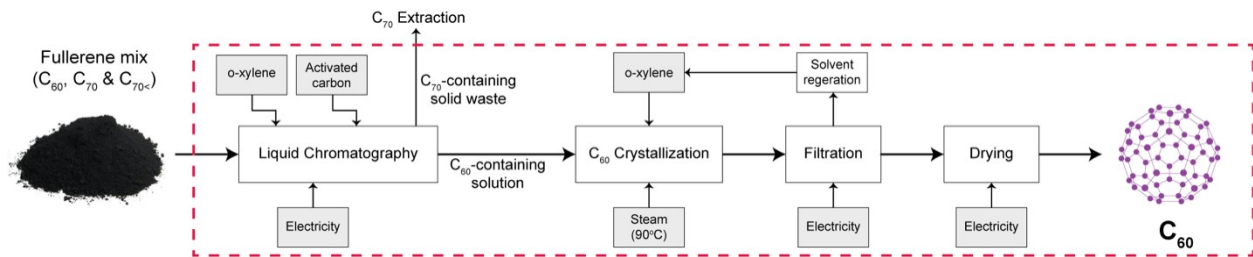

**Fig. S2.** The process flow of crystallization method (Kwok et al. (11)) - Red dash line shows the system boundary used for life cycle assessment (LCA). Grey boxes show input materials/energy.

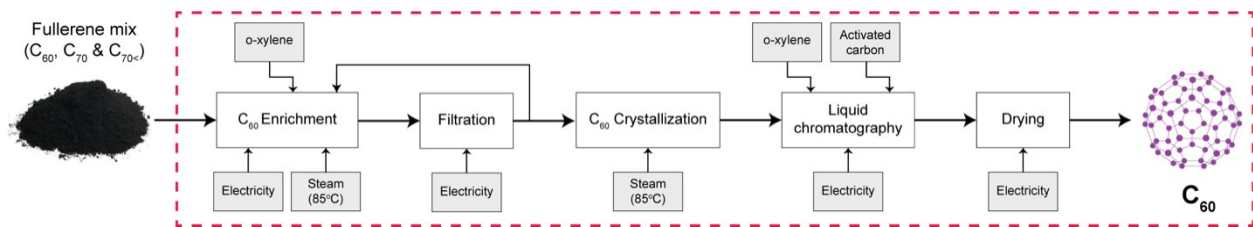

**Fig. S3.** The process flow of crystallization method (Grushko et al. (12)) - Red dash line shows the system boundary used for LCA. Grey boxes show input materials/energy.

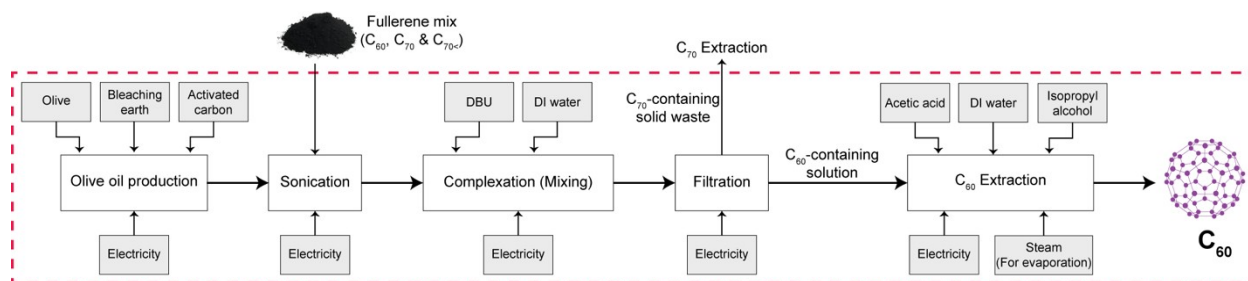

**Fig. S4.** Process flow for P<sub>4</sub> (alternative purification methods using olive oil) - Red dashed line shows the system boundary used for LCA. Grey boxes show input materials/energy. DBU: 1,8-Diazabicyclo[5.4.0]undec-7-ene.

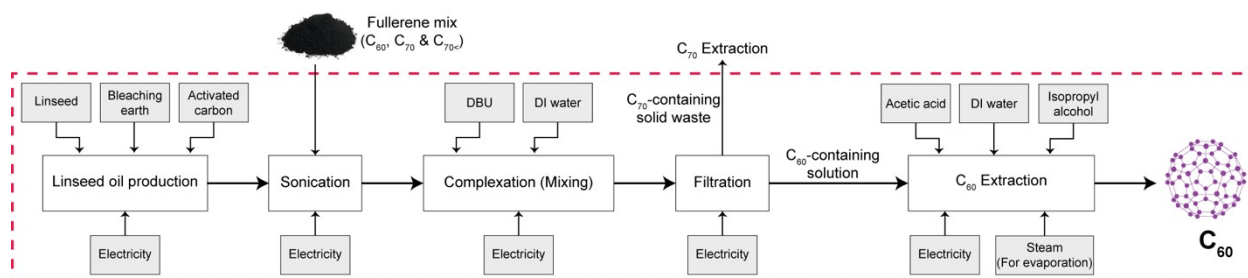

**Fig. S5.** Process flow for P<sub>6</sub> (alternative purification methods using linseed oil) - Red dashed line shows the system boundary used for LCA. Grey boxes show input materials/energy. DBU: 1,8-Diazabicyclo[5.4.0]undec-7-ene.

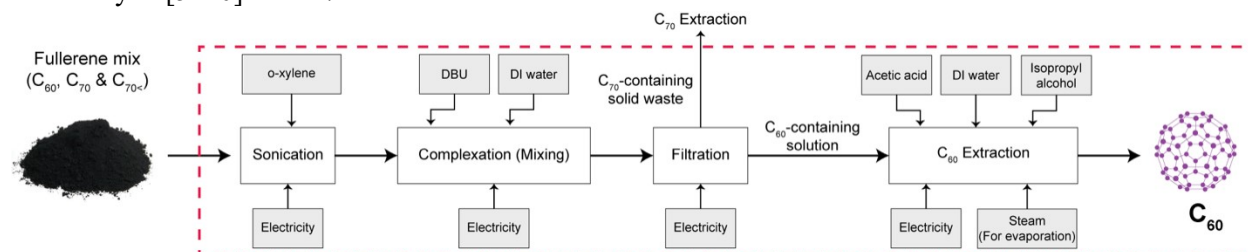

**Fig. S6.** Process flow for P<sub>7</sub> (alternative purification methods using xylene) - Red dashed line shows the system boundary used for LCA. Grey boxes show input materials/energy. DBU: 1,8-Diazabicyclo[5.4.0]undec-7-ene.

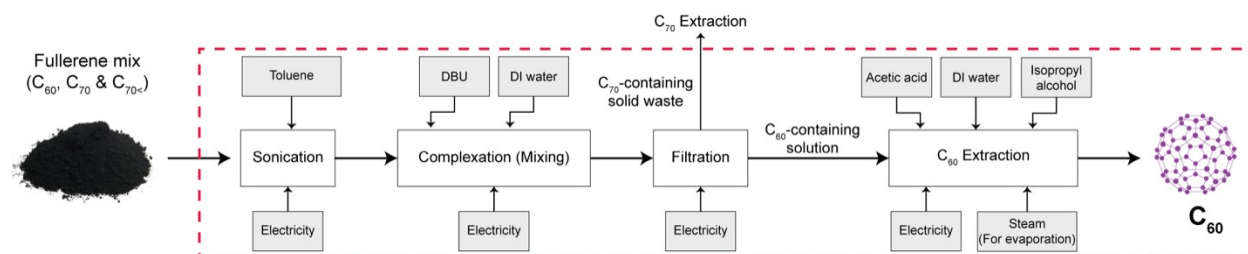

**Fig. S7.** Process flow for P<sub>8</sub> (alternative purification methods using toluene) - Red dashed line shows the system boundary used for LCA. Grey boxes show input materials/energy. DBU: 1,8-Diazabicyclo[5.4.0]undec-7-ene.

## S5 – Prescreening solvents to identify replacements for TMB

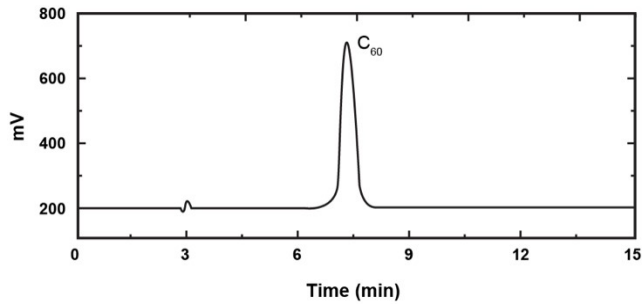

Fig. S8. HPLC analysis for the baseline process (TMB)

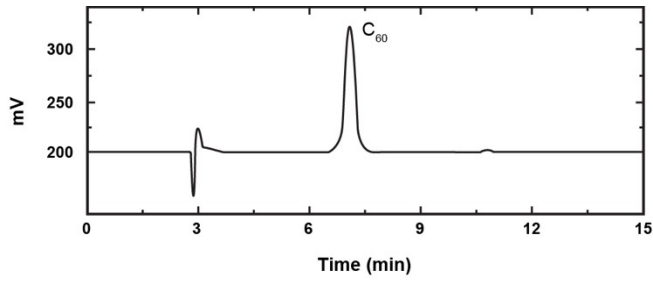

Fig. S9. HPLC analysis for alternative process P<sub>7</sub> (xylene)

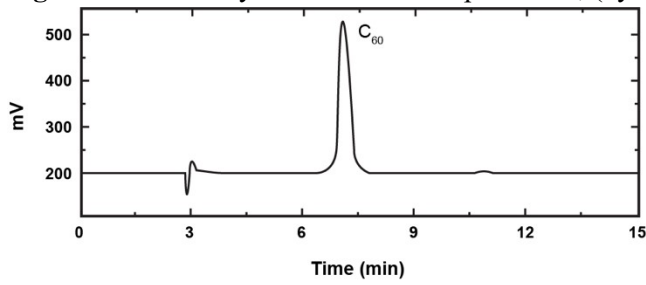

Fig. S10. HPLC analysis for alternative process P<sub>8</sub> (toluene)

## S6 – Life cycle cost analysis

Table S3. life cycle cost analysis

| Material               | Unit | US\$/unit | Year | Ref. |
|------------------------|------|-----------|------|------|
| Crude Oil              | kg   | \$0.49    | 2021 | (13) |
| Bituminous Coal        | kg   | \$0.06    | 2019 | (14) |
| Lignite (brown coal)   | kg   | \$0.02    | 2019 | (14) |
| Anthracite (hard coal) | kg   | \$0.11    | 2019 | (14) |
| Natural Gas            | m3   | \$0.12    | 2020 | (15) |

**Table S4.** Production rate

| Time (hr) | Rate (kg/hr) | Normalized Production Rate |
|-----------|--------------|----------------------------|
| 5.12      | 0.195        | 1                          |
| 5.27      | 0.190        | 0.972                      |
| 5.45      | 0.183        | 0.939                      |
| 5.25      | 0.190        | 0.975                      |
| 5.45      | 0.183        | 0.939                      |
| 5.25      | 0.190        | 0.975                      |
| 5.27      | 0.190        | 0.972                      |
| 5.27      | 0.190        | 0.972                      |

**S7 – Chemical hazard analysis****Table S5.** Solvent chemical hazard scores based on NFPA.

| Solvents                                 | Health (Blue) | Flammability (Red) | Reactivity (Yellow) | Special (white) | Hazardous score | Ref. |
|------------------------------------------|---------------|--------------------|---------------------|-----------------|-----------------|------|
| 1,2,4-trimethylbenzene (TMB)             | 2             | 2                  | 0                   | 0               | 1.33            | (16) |
| AcOH                                     | 3             | 2                  | 0                   | 0               | 1.67            | (16) |
| DBU (1,8-Diazabicyclo[5.4.0]undec-7-ene) | 3             | 1                  | 0                   | 0               | 1.33            | (17) |
| Heptane                                  | 1             | 3                  | 0                   | 0               | 1.33            | (16) |
| IPA                                      | 2             | 3                  | 0                   | 0               | 1.67            | (16) |
| Linseed oil                              | 0             | 1                  | 0                   | 0               | 0.33            | (18) |
| Olive oil                                | 1             | 1                  | 0                   | 0               | 0.67            | (18) |
| Toluene                                  | 3             | 3                  | 0                   | 0               | 2.00            | (16) |
| Xylene                                   | 3             | 3                  | 0                   | 0               | 2.00            | (16) |

## Reference:

1. P.G. Jessop, S. Trakhtenberg and J. Warner, *The Twelve Principles of Green Chemistry, Innovations in Industrial and Engineering Chemistry*, American Chemical Society, 2008, 401–36.
2. T. Y. Yan, Pseudocumene and mesitylene production and coproduction thereof with xylene, US5004854, 1987.
3. E. Lee, C. J. Andrews and A. Anctil, An Iterative Approach to Evaluate and Guide Fine Chemical Processes: An Example from Chloroaluminum Phthalocyanine for Photovoltaic Applications, *ACS Sustain Chem Eng.*, 2018, 6(7), 8230–7.
4. Swiss Centre For Life Cycle Inventories, Ecoinvent Database 3.3. Vol. 2.0, Ecoinvent Centre, 2016.
5. A. Thomas, B. Matthäus and H. J. Fiebig, Fats and Fatty Oils, *Ullmann's Encyclopedia of Industrial Chemistry*, Wiley-VCH Verlag GmbH & Co. KGaA, 2015, 1–84.
6. P. M. Doran, CH11 Unit Operations, *Bioprocess Engineering Principles (Second Edition)*, 2013, 445–595.
7. Catalog, Industrial scale mixer, Amixon, Germany, <https://pdf.directindustry.com/pdf/amixon-gmbh/conical-mixer-type-am/29438-142837.html> (accessed, 26 Feb 2021).
8. Catalog part, Industrial scale oil Sealed Vacuum Pumps (TRIVAC), Leybold Company, 2016, P21, P25, & P29.
9. Industrial Ultrasonic Bath, <https://www.toolots.com/ultrasonic-cleaner-66-6gal-2400w-28-56khz-ce-certified-made-in-taiwan.html> (accessed 1 March 2021)
10. Industrial scale sonicator (Q2000 Sonicator), <https://homogenizers.net/products/q2000-sonicator> (accessed 12 March 2021).
11. K. S. Kwok, Y. C. Chan, K. M. Ng, Separation of fullerenes C<sub>60</sub> and C<sub>70</sub> using a crystallization-based process, *AIChE J*, 2009, 56(7), 1801–12.
12. Y. S. Grushko, V. P. Sedov, V. Shilin, Technology for manufacture of pure fullerenes C<sub>60</sub>, C<sub>70</sub> and a concentrate of higher fullerenes, *Russ J Appl Chem*, 2007, 80(3), 448–55.
13. Petroleum & Other Liquids, U.S. Energy Information Administration (EIA).
14. Energy Information Administration (EIA), Annual Coal Report 2019, US Dep Energy. 2020.
15. United States Natural Gas Industrial Price (Dollars per Thousand Cubic Feet).
16. Fisher Scientific, <https://www.fishersci.com>
17. MSDS for DBU (1,8-Diazabicyclo[5.4.0]undec-7-ene), NFPA, <https://datasheets.scbt.com/sc-251609.pdf> (accessed 10 May 2021)
18. Certificate of Analysis For Olive Oil, Sigma-Aldrich, <https://www.sigmaaldrich.com/catalog/CertOfAnalysisPage.do?symbol=O1514&LotNo=BCCB9747&brandTest=SIGMA&returnUrl=%2Fproduct%2FSIGMA%2FO1514>
